# Supplementary material for: Hypervalent organobismuth(iii) carbonate, chalcogenides and halides with the pendant arm ligands 2-(Me2NCH2)C6H4 and 2,6-(Me2NCH2)2C6H3
Source: Royal Society of Chemistry journal article supplement (doi:10.1039/b717127g), 2008-01-01
Supplement: b717127g.pdf [file b717127g.pdf]

## Electronic Supplementary Information

### **Hypervalent organobismuth(III) carbonate, chalcogenides and halides with the pendant arm ligands 2-(Me<sub>2</sub>NCH<sub>2</sub>)C<sub>6</sub>H<sub>4</sub> and 2,6-(Me<sub>2</sub>NCH<sub>2</sub>)<sub>2</sub>C<sub>6</sub>H<sub>3</sub>**

**Hans J. Breunig,<sup>\*a</sup> Lucia Königsmann,<sup>a</sup> Enno Lork,<sup>a</sup> Mihai Nema,<sup>b</sup> Nicky Philipp,<sup>a</sup> Cristian Silvestru,<sup>\*b</sup> Albert Soran,<sup>b</sup> Richard A. Varga<sup>b</sup> and Roxana Wagner<sup>a</sup>**

<sup>a</sup> Institut für Anorganische und Physikalische Chemie, Universität Bremen, D-28334, Bremen, Germany. E-mail: [breunig@chemie.uni-bremen.de](mailto:breunig@chemie.uni-bremen.de); Fax: +49 421 218 4042; Tel: +49 421 218 2266

<sup>b</sup> Facultatea de Chimie si Inginerie Chimica, Universitatea Babes-Bolyai, RO-400028, Cluj-Napoca, Romania. E-mail: [cristi@chem.ubbcluj.ro](mailto:cristi@chem.ubbcluj.ro); Fax: +40 264 590818; Tel: +40 264 593833

## Solid state structure

### [2-(Me<sub>2</sub>NCH<sub>2</sub>)C<sub>6</sub>H<sub>4</sub>]<sub>2</sub>BiOH·2H<sub>2</sub>O (1·2H<sub>2</sub>O)

- the crystal contains a 1:1 mixture of (*S*<sub>N1</sub>,*R*<sub>N2</sub>) and (*R*<sub>N1</sub>,*S*<sub>N2</sub>) isomers
- the crystal contains polymeric chains built from (*R*<sub>N1</sub>,*R*<sub>N2</sub>) or (*S*<sub>N1</sub>,*S*<sub>N2</sub>) isomers connected through oxygen-hydrogen contacts.

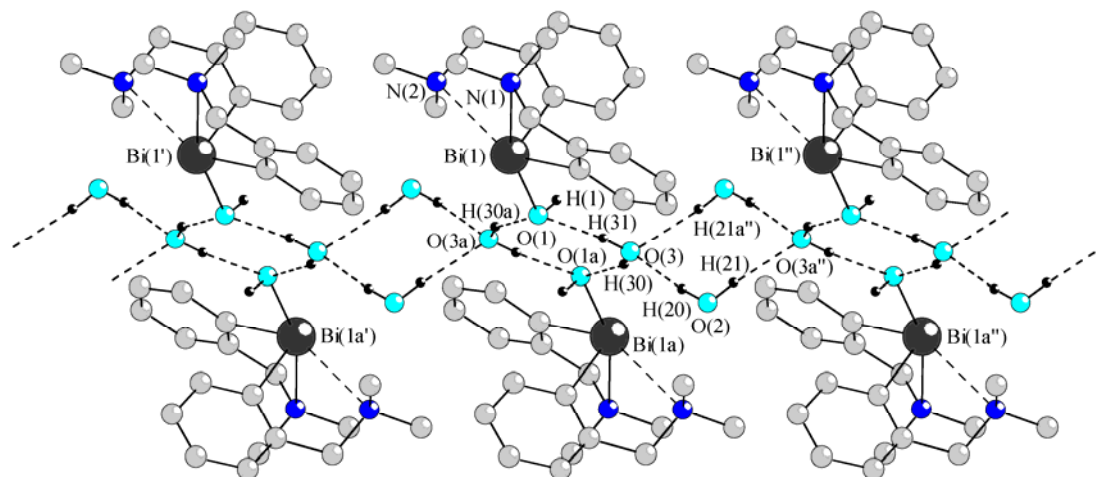

**Figure S1.** View along *a* axis of the ribbon-like polymer of (*R*<sub>N1</sub>,*R*<sub>N2</sub>)- and (*S*<sub>N1</sub>,*S*<sub>N2</sub>)-**1** isomers based on intermolecular oxygen-hydrogen contacts. Symmetry equivalent positions: H(30a) (-*x*, -*y*, 1-*z*); H(21a'') (-*x*, -*y*, -*z*). Intermolecular contacts within a chain: O(1)⋯H(30a)<sub>water</sub> 2.04(9) Å; O(1)⋯H(31)<sub>water</sub> 1.95(7) Å; O(3)⋯H(20)<sub>water</sub> 2.08(11) Å; O(3)⋯H(21a'')<sub>water</sub> 2.07(8) Å [c.f.  $\sum r_{\text{vdW}}(\text{O},\text{H})$  2.60 Å]. No further inter-chain contacts.

**[{2-(Me<sub>2</sub>NCH<sub>2</sub>)C<sub>6</sub>H<sub>4</sub>}<sub>2</sub>Bi]<sub>2</sub>S (4)**

- the crystal contains a 1:1 mixture of (*S*<sub>N1</sub>,*R*<sub>N2</sub>) and (*R*<sub>N1</sub>,*S*<sub>N2</sub>) isomers

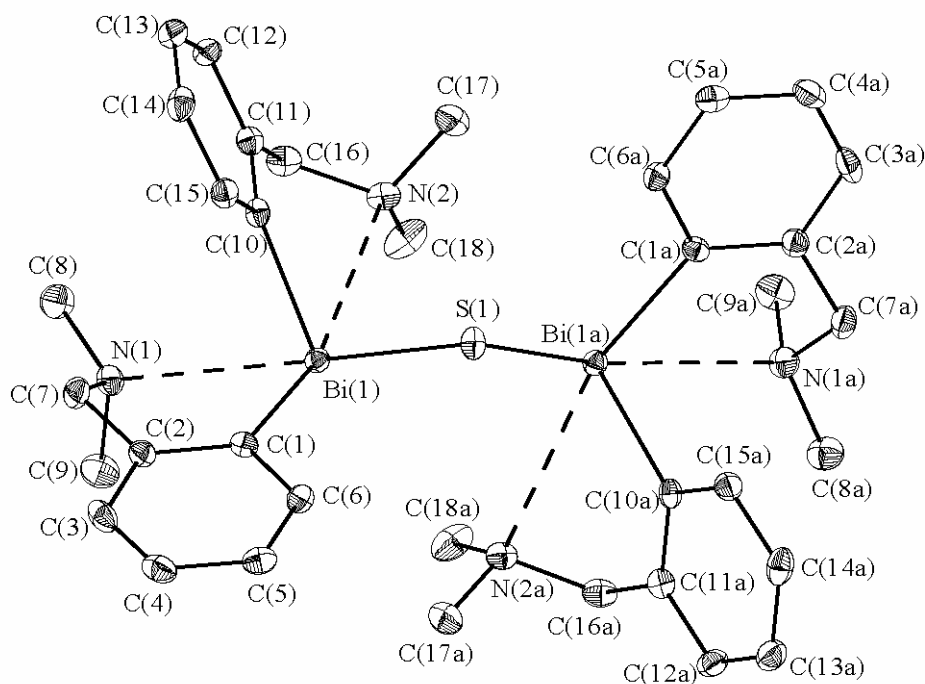

**Figure S2.** ORTEP representation at 30% probability and atom numbering scheme for (*S*<sub>N1</sub>,*R*<sub>N2</sub>)-4 isomer [symmetry equivalent atoms ( $1 -x, y, 0.5 -z$ ) are given by “a”]. Hydrogen atoms are omitted.

**[2-(Me<sub>2</sub>NCH<sub>2</sub>)C<sub>6</sub>H<sub>4</sub>]<sub>2</sub>BiBr (5)**

- the crystal contains a 1:1 mixture of (*S*<sub>N1</sub>,*R*<sub>N2</sub>) and (*R*<sub>N1</sub>,*S*<sub>N2</sub>) isomers

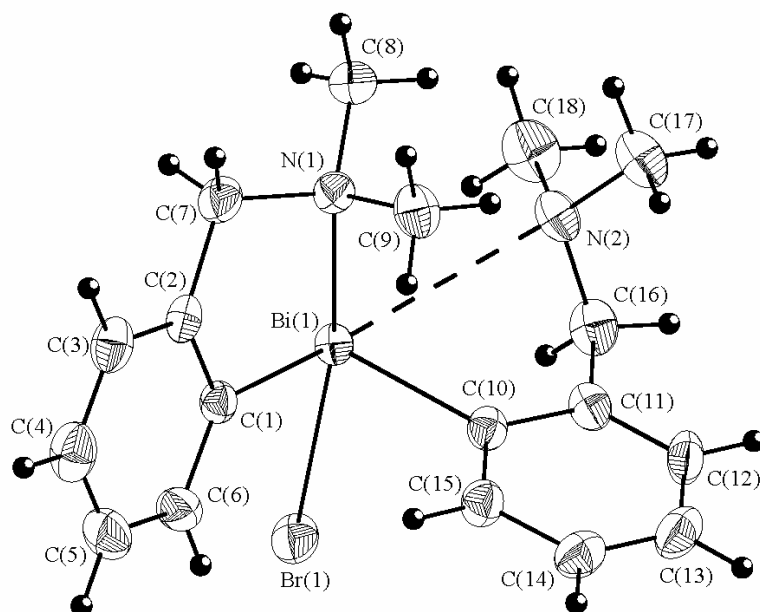

**Figure S3.** ORTEP representation at 30% probability and atom numbering scheme for (*S*<sub>N1</sub>,*R*<sub>N2</sub>)-**5** isomer.

- the crystal contains dimer associations built from (*R*<sub>N1</sub>,*S*<sub>N2</sub>) and (*S*<sub>N1</sub>,*R*<sub>N2</sub>) isomers connected through halogen-hydrogen and arene⋯Bi contacts.

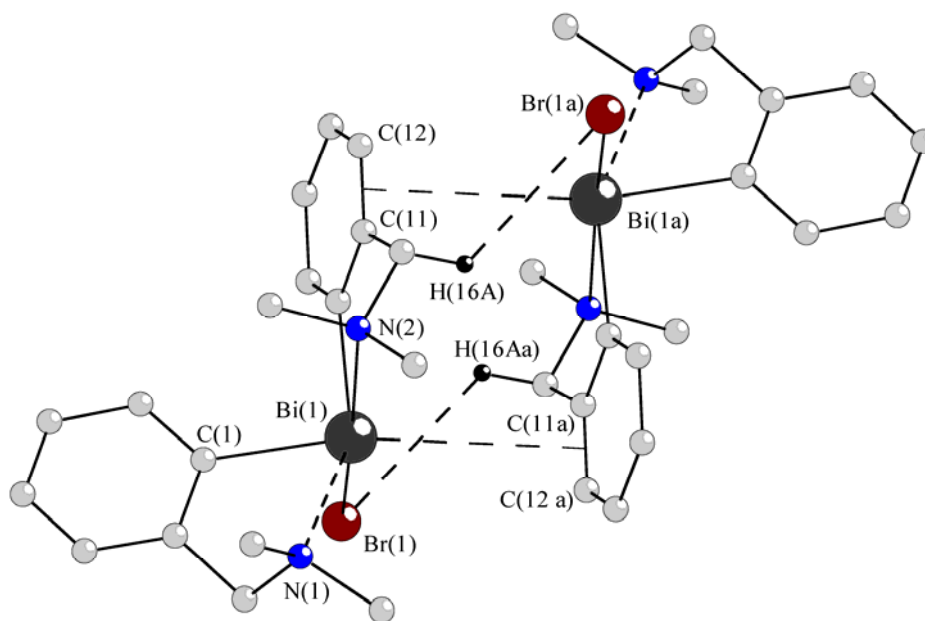

**Figure S4.** View of dimer association of (*R*<sub>N1</sub>,*S*<sub>N2</sub>) and (*S*<sub>N1</sub>,*R*<sub>N2</sub>)-**5** isomers based on intermolecular Br⋯H (only hydrogens involved in intermolecular interactions are shown) and η<sup>2</sup>-arene⋯Bi contacts in the crystal of **5**. Symmetry equivalent positions: Bi(1a) (-x, -y, 1-z). Intermolecular contacts within a dimer unit: Br(1)⋯H(16Aa)<sub>methylene</sub> 3.10(1) Å [c.f. Σ*r*<sub>vdw</sub>(Br,H) 3.15 Å]; η<sup>2</sup>-Ph⋯Bi(1) 3.705(3) Å; Bi(1)⋯C(11a) 3.785(6), Bi(1)⋯C(12a) 3.751(7) Å; the rest of the Bi(1)⋯C distances are in the range 4.144-4.548 Å; c.f. sums of the corresponding van der Waals radii, Σ*r*<sub>vdw</sub>(Bi,C) 4.25 Å]. No further inter-dimer contacts.

**[2-(Me<sub>2</sub>NCH<sub>2</sub>)C<sub>6</sub>H<sub>4</sub>]<sub>2</sub>BiI (6)**

- the crystal contains dimer associations built from (*R*<sub>N1</sub>,*S*<sub>N2</sub>) and (*S*<sub>N1</sub>,*R*<sub>N2</sub>) isomers connected through halogen-hydrogen and arene...Bi contacts.

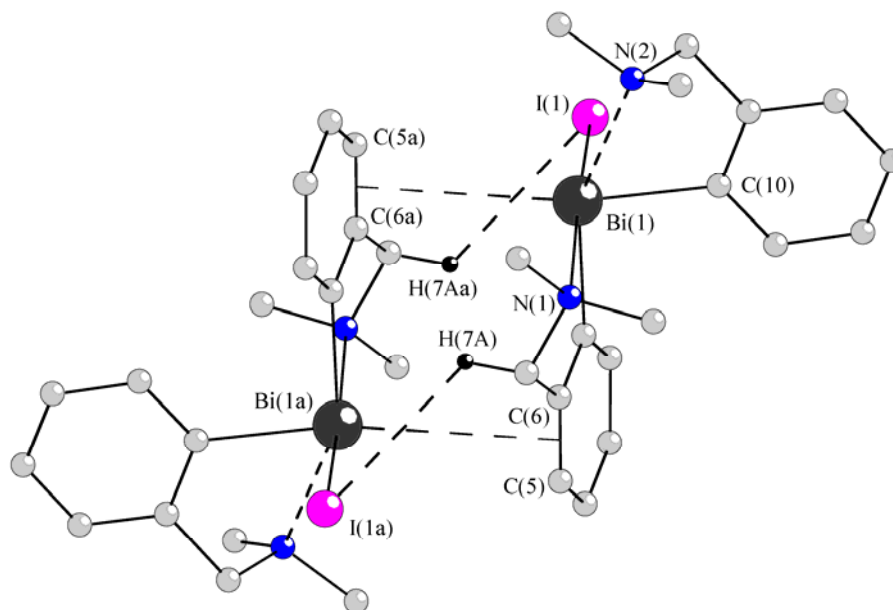

**Figure S5.** View of dimer association of (*R*<sub>N1</sub>,*S*<sub>N2</sub>) and (*S*<sub>N1</sub>,*R*<sub>N2</sub>)-**6** isomers based on intermolecular I...H (only hydrogens involved in intermolecular interactions are shown) and  $\eta^2$ -arene...Bi contacts in the crystal of **6**. Symmetry equivalent positions: Bi(1a) (1-x, 1-y, 1-z). Intermolecular contacts within a dimer unit: I(1)...H(7Aa)<sub>methylene</sub> 3.22(1) Å [c.f.  $\Sigma r_{\text{vdW}}(\text{I,H})$  3.35 Å];  $\eta^2$ -Ph...Bi(1) 3.718(1) Å; Bi(1)...C(5a) 3.770(5), Bi(1)...C(6a) 3.794(5) Å; the rest of the Bi(1)...C distances are in the range 4.127-4.513 Å; c.f. sums of the corresponding van der Waals radii,  $\Sigma r_{\text{vdW}}(\text{Bi,C})$  4.25 Å].

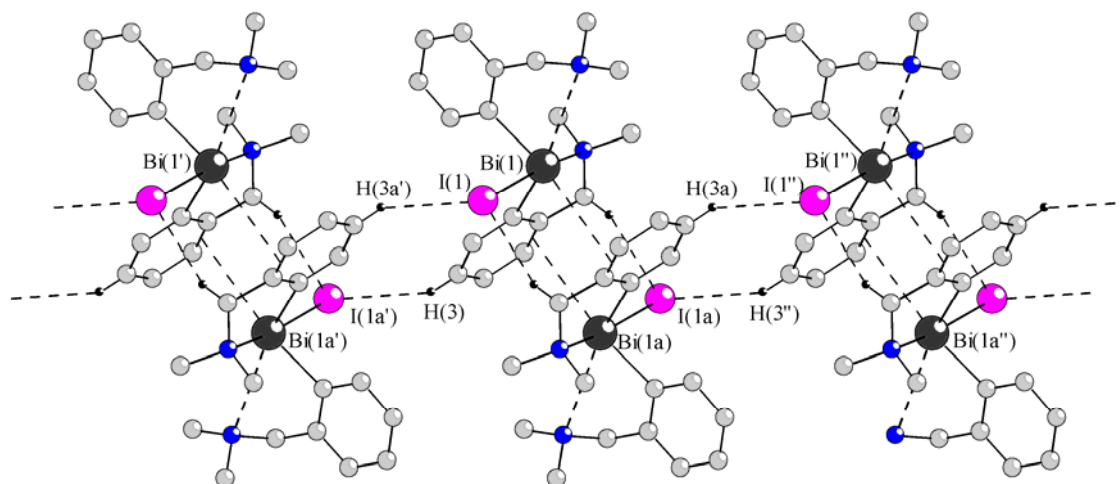

**Figure S6.** View along *c* axis of the ribbon-like polymer built from (*R*<sub>N1</sub>,*S*<sub>N2</sub>)/(*S*<sub>N1</sub>,*R*<sub>N2</sub>) dimers through inter-dimer I...H contacts (only hydrogens involved in intermolecular interactions are shown) in the crystal of **6**. Symmetry equivalent positions: H(3a') (-x, 1-y, 1-z); H(3a'') (1+x, y, z). Inter-dimer contacts within the polymer: I(1)...H(3a')<sub>aryl</sub> 3.318(1) Å [c.f.  $\Sigma r_{\text{vdW}}(\text{I,H})$  3.35 Å].

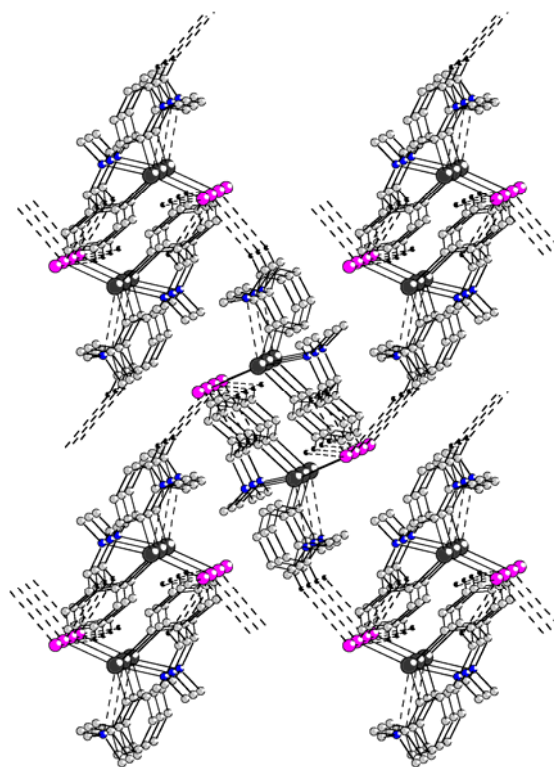

**Figure S7.** View along *a* axis of 3D supramolecular architecture built through I...H contacts (only hydrogens involved in intermolecular interactions are shown) between parallel ribbon-like polymers in the crystal of **6**. Symmetry equivalent positions: H(14b) (0.5-x, -0.5+y, 1.5-z). Inter-polymer contacts: I(1)···H(14b)<sub>aryl</sub> 3.261(6) Å [c.f.  $\sum r_{\text{vdW}}(\text{I,H})$  3.35 Å].

[2-(Me<sub>2</sub>NCH<sub>2</sub>)C<sub>6</sub>H<sub>4</sub>]BiCl<sub>2</sub> (7)

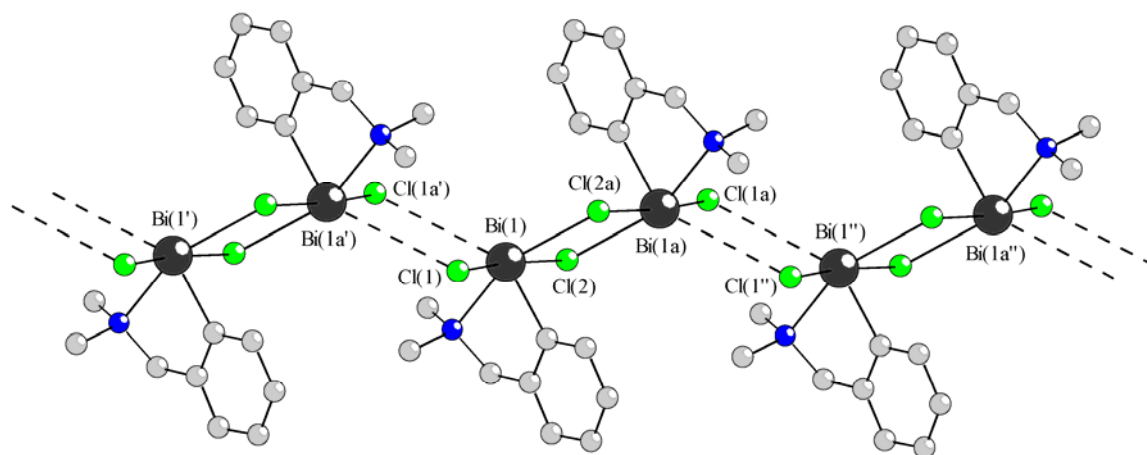

**Figure S8.** View of the ribbon-like polymer built from (*R,S*) dimers through inter-dimer Bi...Cl interactions in the crystal of **7**. Symmetry equivalent positions: Bi(1a) (1-x, -y, 1-z); Bi(1a') (-x, -y, 1-z); Bi(1'') (1+x, y, z). Inter-dimer interactions within the polymer: Bi(1)···Cl(1a') 3.690(2) Å [c.f.  $\sum r_{\text{vdW}}(\text{Bi}, \text{Cl})$  4.20 Å].

- these ribbon-like polymers are associated into a 3D architecture through halogen-hydrogen contacts.

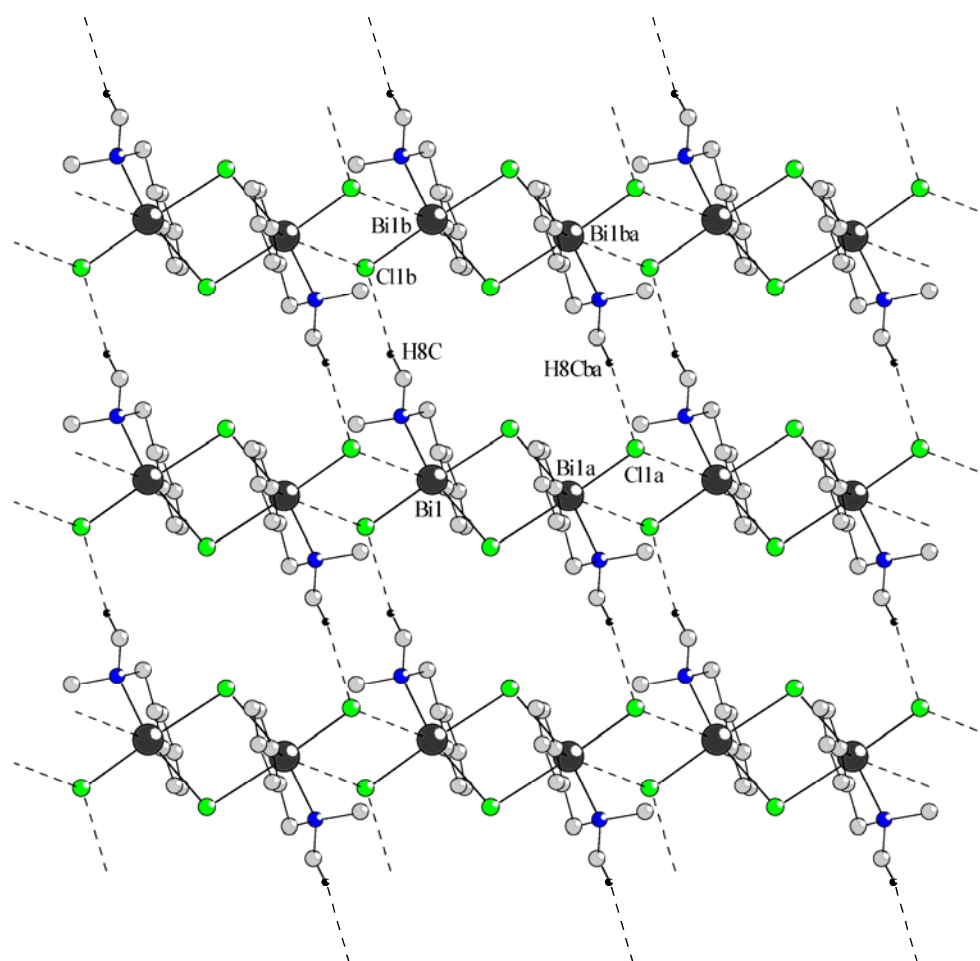

**Figure S9.** View along *c* axis of layer built from ribbon-like polymers through inter-polymer Cl...H contacts (only hydrogens involved in inter-polymer interactions within a layer are shown) in the crystal of **7**. Symmetry equivalent positions: Cl(1b) (x, 1+y, z); H(8Cba) (1-x, 1-y, 1-z). Inter-polymer interactions within the layer: Cl(1a)···H(8Cba)<sub>methyl</sub> 2.840(2) Å [c.f.  $\sum r_{\text{vdW}}(\text{Cl}, \text{H})$  3.0 Å].

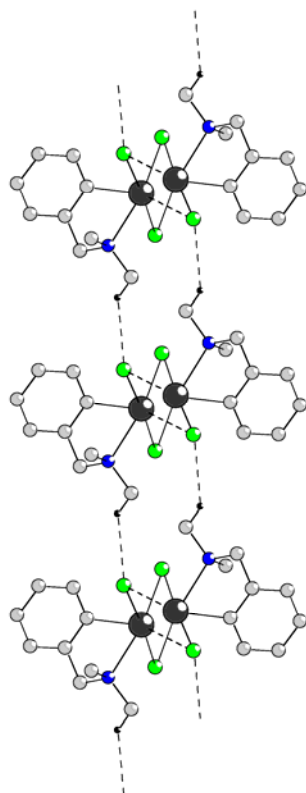

**Figure S10.** View along *a* axis of layer built from ribbon-like polymers through inter-polymer Cl...H contacts in the crystal of **7**.

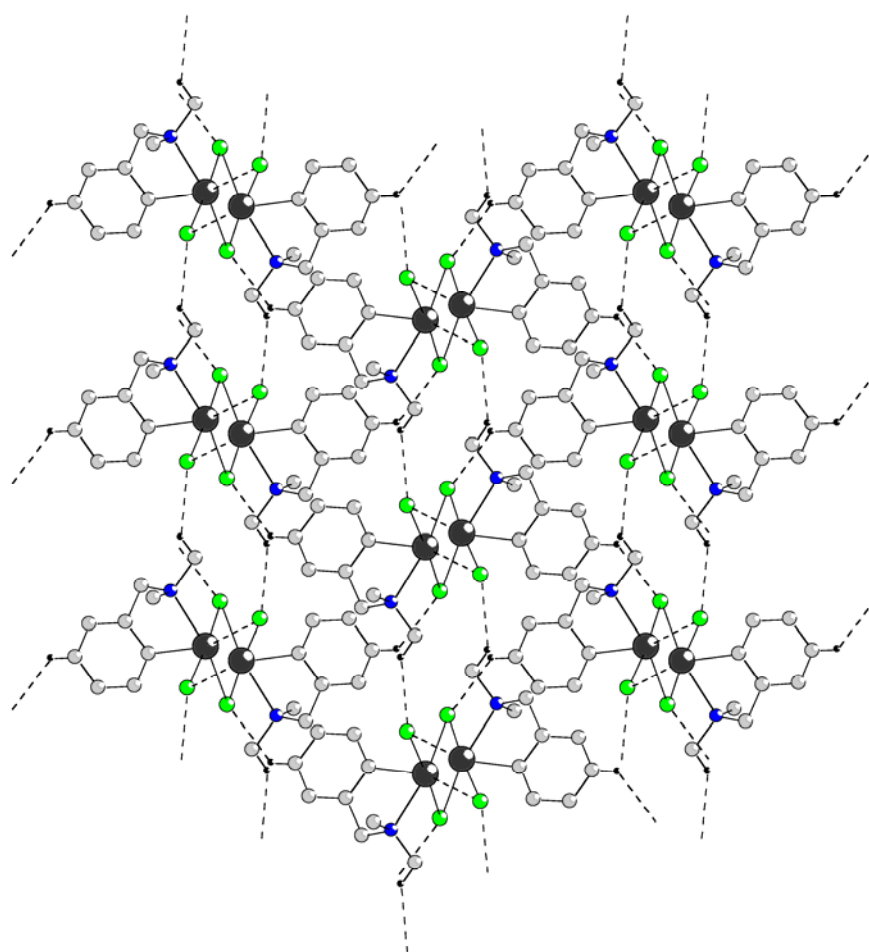



**Figure S11.** View along *a* axis of the 3D architecture built from polymer layers through inter-layer Cl $\cdots$ H contacts (only hydrogens involved in inter-polymer interactions are shown) in the crystal of **7**. Symmetry equivalent positions: H(4<sup>i</sup>) (1-x, 0.5+y, 0.5-z);. Inter-layer interactions: Cl(2) $\cdots$ H(4<sup>i</sup>)<sub>phenyl</sub> 2.840(2) Å.

**[{2,6-(Me<sub>2</sub>NCH<sub>2</sub>)<sub>2</sub>C<sub>6</sub>H<sub>3</sub>}BiS]<sub>2</sub> (9)**

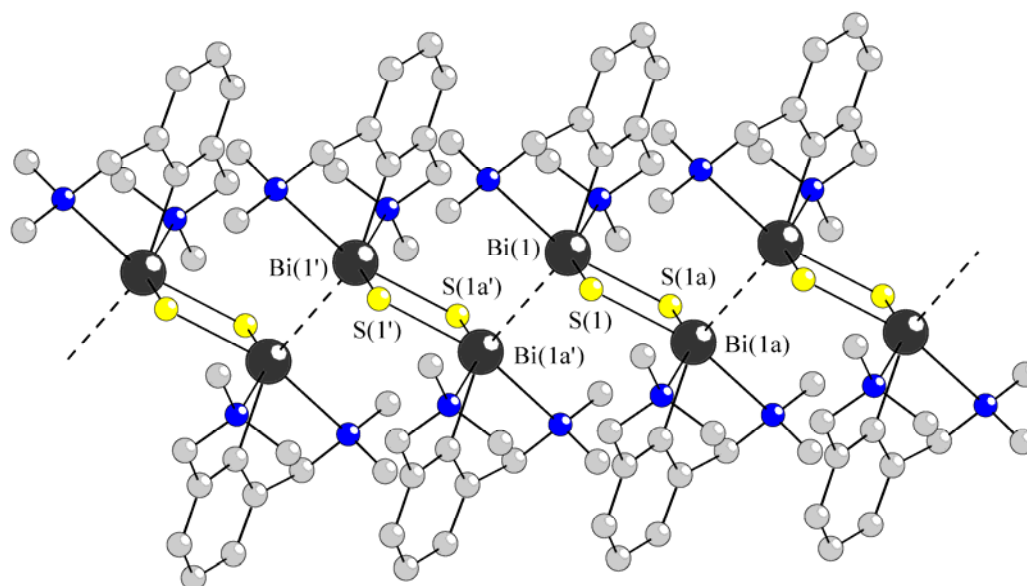

**Figure S12.** View of polymer built in the crystal of **9** through Bi···Bi interactions. Symmetry equivalent positions: Bi(1a') (-x, 1-y, -z). Bi(1)···Bi(1a') 3.917(1) Å [c.f.  $\Sigma_{\text{vdw}}(\text{Bi,Bi})$  4.80 Å].
